# Supplementary material for: The effect of size-scale on the kinematics of elastic energy release
Source: Royal Society of Chemistry journal article supplement (doi:10.1039/c9sm00870e), 2019-01-01
Supplement: c9sm00870e1.pdf [file c9sm00870e1.pdf]

**Supplementary Information for**  
**The effect of size-scale on the kinematics of elastic energy release**

Mark Ilton,<sup>1</sup> S. M. Cox,<sup>2</sup> Thijs Egelmeers,<sup>1</sup> Gregory P. Sutton,<sup>3</sup> S. N. Patek,<sup>4</sup> and Alfred J. Crosby<sup>1, \*</sup>

<sup>1</sup>*Department of Polymer Science & Engineering,  
University of Massachusetts Amherst, Amherst, MA, 01003*

<sup>2</sup>*Department of Kinesiology, The Pennsylvania State University, University Park, PA, 16802*

<sup>3</sup>*School of Biological Sciences, University of Bristol, Bristol BS8 1UG, UK*

<sup>4</sup>*Department of Biology, Duke University, Durham, NC 27708*

## BENDING AND RECOIL OF A CANTILEVERED BEAM

Here we consider a long, thin beam with length,  $L$ , width,  $w$  and thickness,  $h$ , which is fixed at one end and undergoes a deflection,  $x$ , at its free end in response to an applied force,  $F$ . For the case of  $L \gg w \gg h$ , with the beam being comprised of a uniform, linear elastic material with modulus,  $E$ , and density,  $\rho$ , the force is related to the displacement by [1]

$$F = \frac{Ewh^3}{4L^3}x, \quad (1)$$

in the limit of small displacements. For the case where the largest stress component occurs along the longitudinal axis of the beam, the maximum stress in the beam,  $\sigma_{\max}$ , is given by

$$\sigma_{\max} = \frac{6FL}{wh^2}. \quad (2)$$

Calculating the energy per unit volume for the cantilevered beam,

$$\frac{U}{Lwh} = \frac{Fx}{2Lwh} = \frac{\sigma_{\max}^2}{18E}, \quad (3)$$

gives an energy per unit volume that is 9 times smaller than that for uniaxial extension ( $\sigma_{\max}^2/2E$ ), the geometry used in the main text.

For the recoil of a long cantilevered beam driving a heavy mass,  $m$ , such that  $m \gg \rho Lwh$ , from an initial maximum strain  $s_{\text{in}}$ , the maximum velocity of the mass is given by [2]

$$v_{\max} = \frac{c s_{\text{in}}}{\sqrt{m + \rho Lwh/3}}, \quad (4)$$

where we have used  $c = \sqrt{E/\rho}$  and  $\sigma_{\max} = Es_{\text{in}}$ . Since the recoil dynamics of the mass are described by a quarter period of a harmonic motion, the duration of recoil  $\Delta t$  is given by

$$\Delta t = \frac{\pi}{2} \sqrt{\frac{m + \rho Lwh/3}{k}} = \frac{\pi}{c} \frac{L}{h} \sqrt{\frac{m + \rho Lwh/3}{\rho Lwh}}, \quad (5)$$

where the beam stiffness  $k = \frac{Ewh^3}{4L^3}$ . Finally, the maximum acceleration is given by

$$a_{\max} = \frac{\pi v_{\max}}{2\Delta t} = \frac{c^2 s_{\text{in}}}{6L} \frac{h}{L \sqrt{\frac{m}{\rho Lwh} + \frac{1}{3}}}. \quad (6)$$

Since the dimensionless ratios of  $h/L$  and  $m/\rho Lwh$  are constant under an isometric change of size, the overall size-scalings for the recoil of a cantilever driving a heavy mass (the terms in round brackets in Eqs. (4)-(6)) are the same as uniaxial recoil described in the main text.

\* crosby@mail.pse.umass.edu

[1]S. P. Timoshenko and J. N. Goodier, *Theory of Elasticity*, Vol. 3 (McGraw-Hill, New York London, 1970).

[2]M. Ilton, M. S. Bhamla, X. Ma, S. M. Cox, L. L. Fitchett, Y. Kim, J.-S. Koh, D. Krishnamurthy, C.-Y. Kuo, F. Z. Temel, A. J. Crosby, M. Prakash, G. P. Sutton, R. J. Wood, E. Azizi, S. Bergbreiter, and S. N. Patek, *Science* **360**, eaa01082 (2018).
